# Supplementary material for: Solution-processable low-bandgap 3-fluorothieno[3,4-b]thiophene-2-carboxylate-based conjugated polymers for electrochromic applications
Source: Royal Society of Chemistry journal article supplement (doi:10.1039/c5ra19956e), 2015-01-01
Supplement: c5ra19956e1.pdf [file c5ra19956e1.pdf]

## Supporting Information

### **Solution-processable Low-bandgap 3-Fluorothieno[3,4-b]thiophene-2-carboxylate-based Conjugated Polymers for Electrochromic Applications**

Zugui Shi,<sup>a</sup> Wei Teng Neo,<sup>a,b</sup> Ting Ting Lin,<sup>a</sup> Hui Zhou<sup>a</sup> and Jianwei Xu<sup>a,c,\*</sup>

<sup>a</sup>Institute of Materials Research and Engineering, 2 Fusionopolis Way, #08-03, Innovis, Singapore 138634

<sup>b</sup>NUS Graduate School for Integrative Sciences and Engineering, National University of Singapore, 28 Medical Drive, Singapore 117456

<sup>c</sup>Department of Chemistry, National University of Singapore, 3 Science Drive 3, Singapore 117543

\* Email: jw-xu@imre.a-star.edu.sg

#### **1 NMR of Monomers and Polymers**

#### **2 GPC and TGA Plots of Polymers**

#### **3 References**

## NMR of Monomers and Polymers

### 2-butyloctyl 4, 6-dibromo-3-fluorothiopheno[3, 4-b]thiophene-2-carboxylate (2)

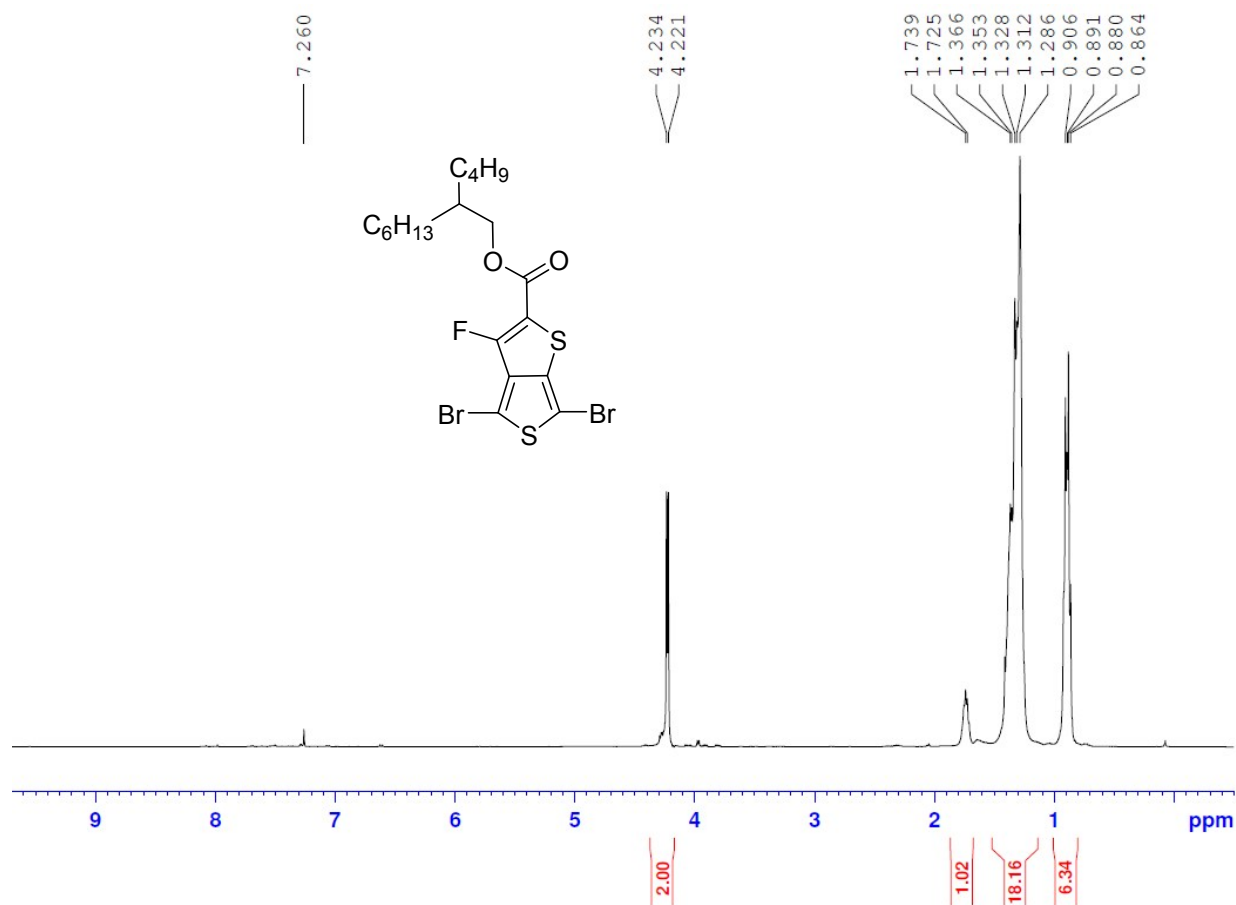

Figure S1 <sup>1</sup>H NMR spectrum of 2

2-butyloctyl 3-fluoro-4,6-di(thiophen-2-yl)thieno[3,4-b]thiophene-2-carboxylate (3)

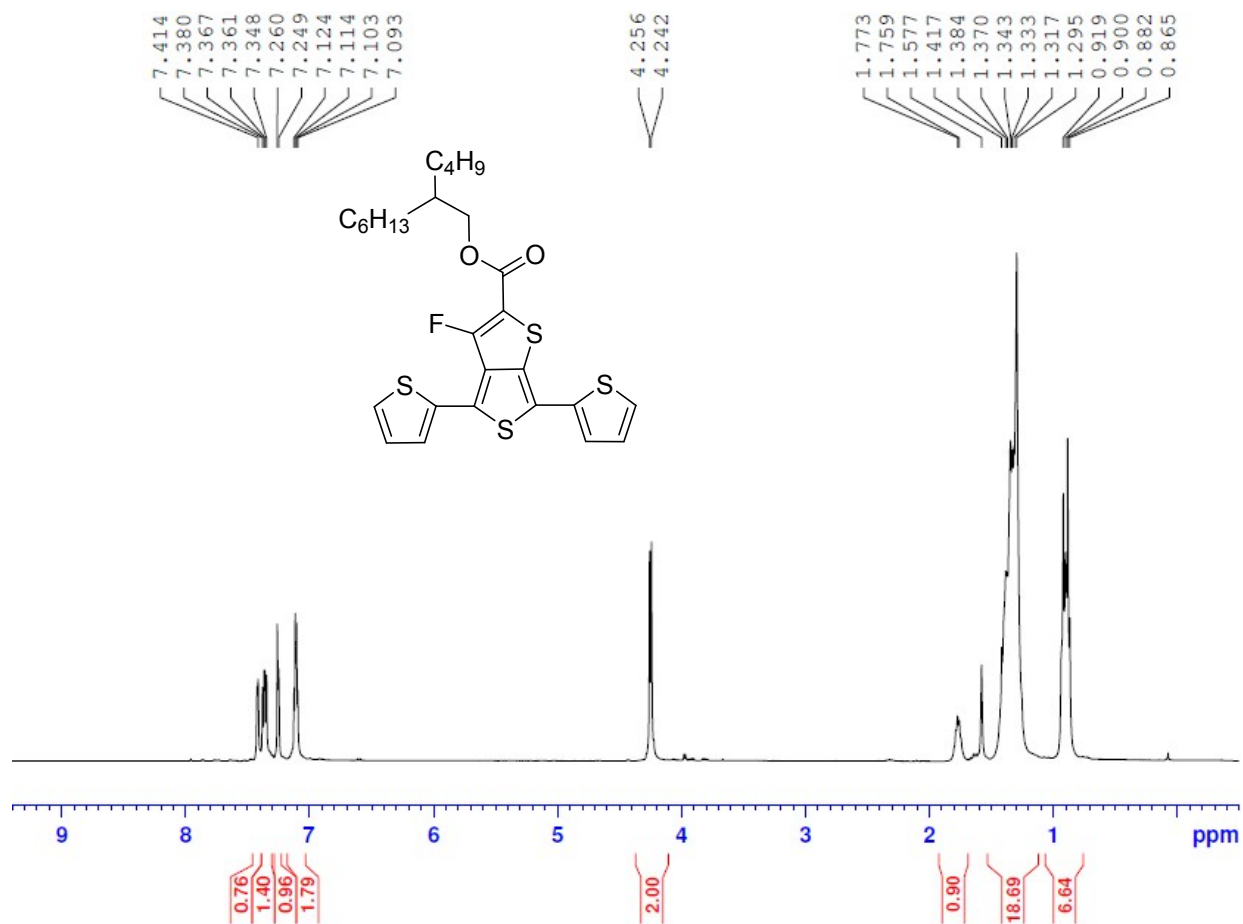

Figure S2 <sup>1</sup>H NMR spectrum of 3

2-butyl 4, 6-bis(5-bromothiophen-2-yl)-3-fluorothiopheno[3, 4-b]thiophene-2-carboxylate (4)

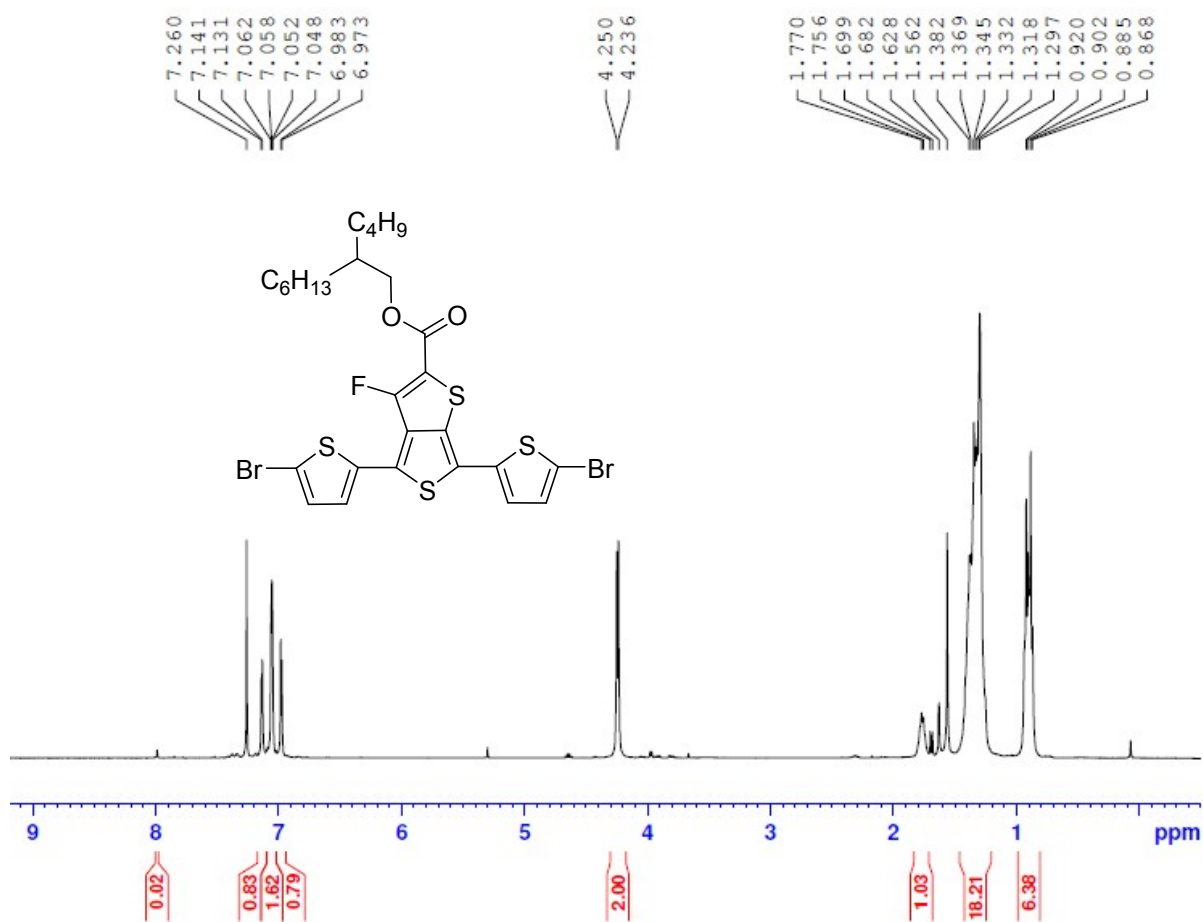

**Figure S3**  $^1\text{H}$  NMR spectrum of **4**

Monomers **5**, **6** and **7** were prepared according to literature reported method.<sup>1,2</sup>

Monomer **5**.  $^1\text{H}$  NMR (400 MHz,  $\text{CDCl}_3$ )  $\delta$  (ppm) 4.15 (s, 4H), 0.89 (s, 18H).

Monomer **6**.  $^1\text{H}$  NMR (400 MHz,  $\text{CDCl}_3$ )  $\delta$  (ppm) 3.92 (t,  $J = 8.0$  Hz, 4H), 1.72 (q,  $J = 7.2$  Hz, 4H), 1.44-1.29 (m, 36H), 0.90 (t,  $J = 6.8$  Hz, 6H), 0.34 (s, 18H).

Monomer **7**.  $^1\text{H}$  NMR (400 MHz,  $\text{CDCl}_3$ )  $\delta$  (ppm) 3.74 (s, 4H), 1.28 (m, 40H), 0.90 (t,  $J = 6.8$  Hz, 6H), 0.32 (s, 18H).

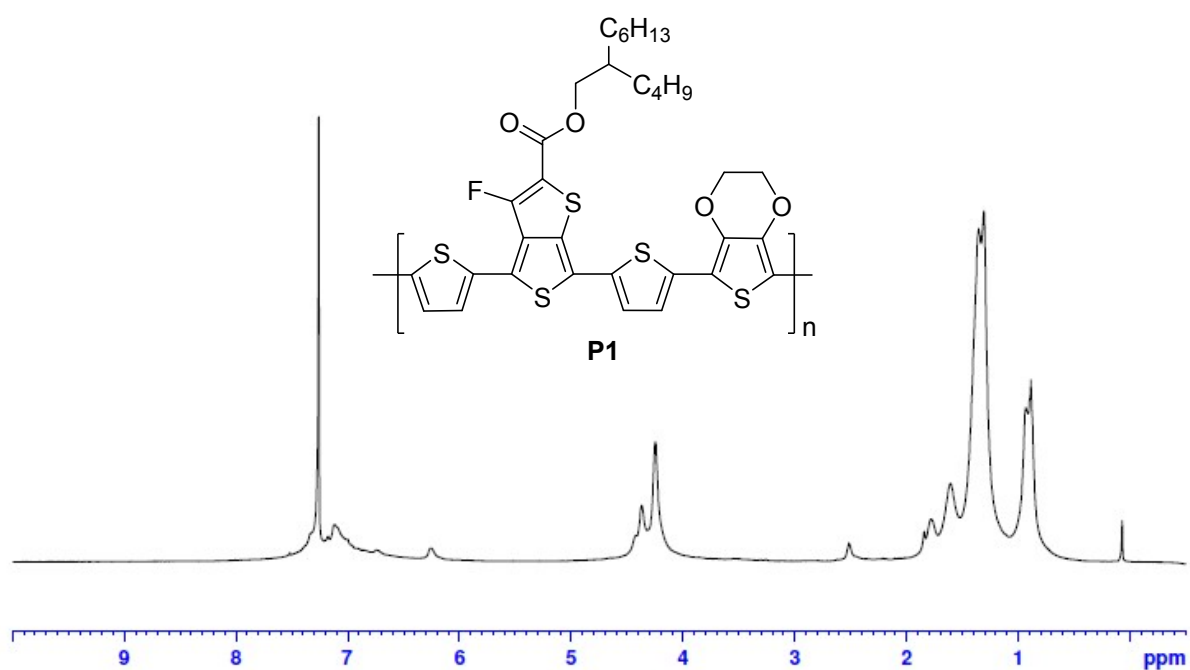

**Figure S4**  $^1\text{H}$  NMR spectrum of **P1**

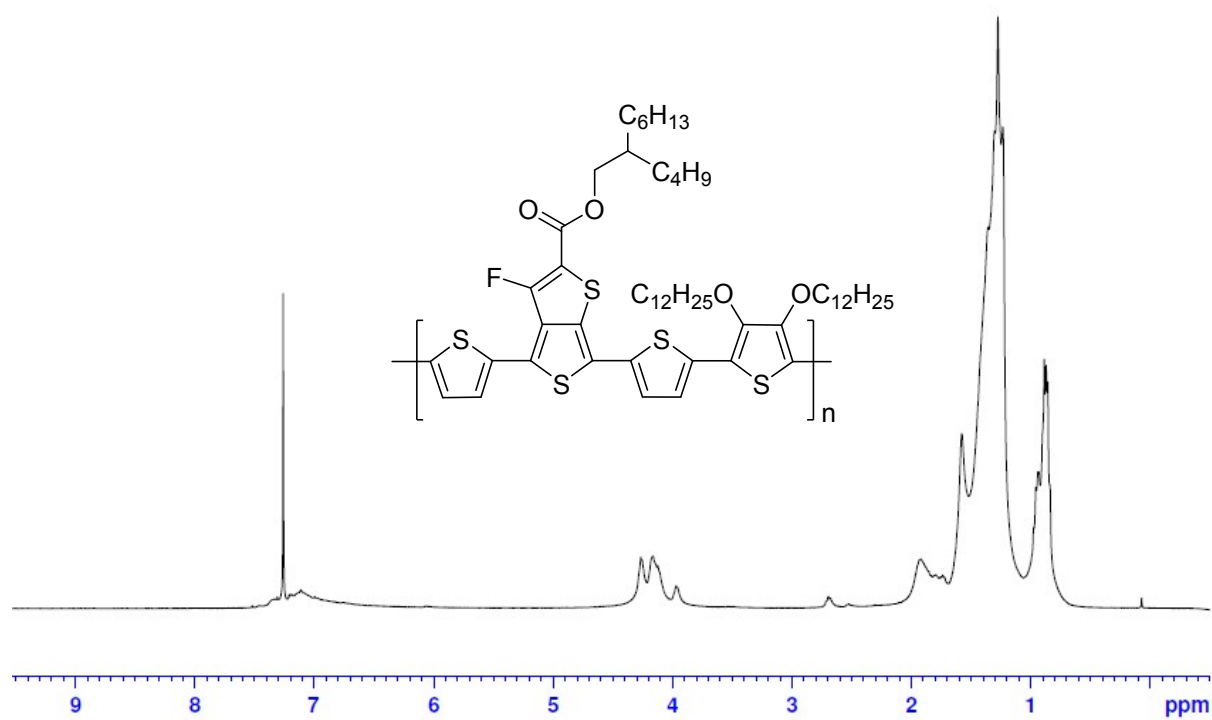

**Figure S5**  $^1\text{H}$  NMR spectrum of **P2**

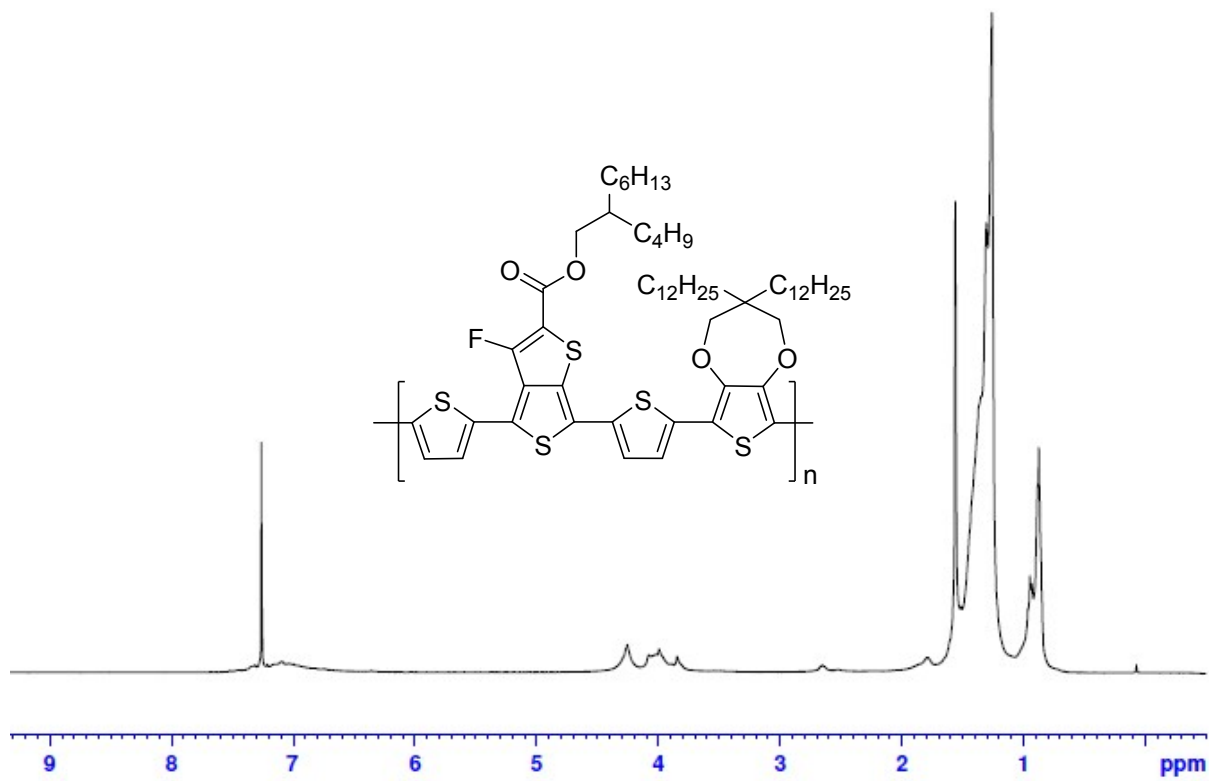

**Figure S6**  $^1\text{H}$  NMR spectrum of **P3**

## GPC and TGA Plots of Polymers

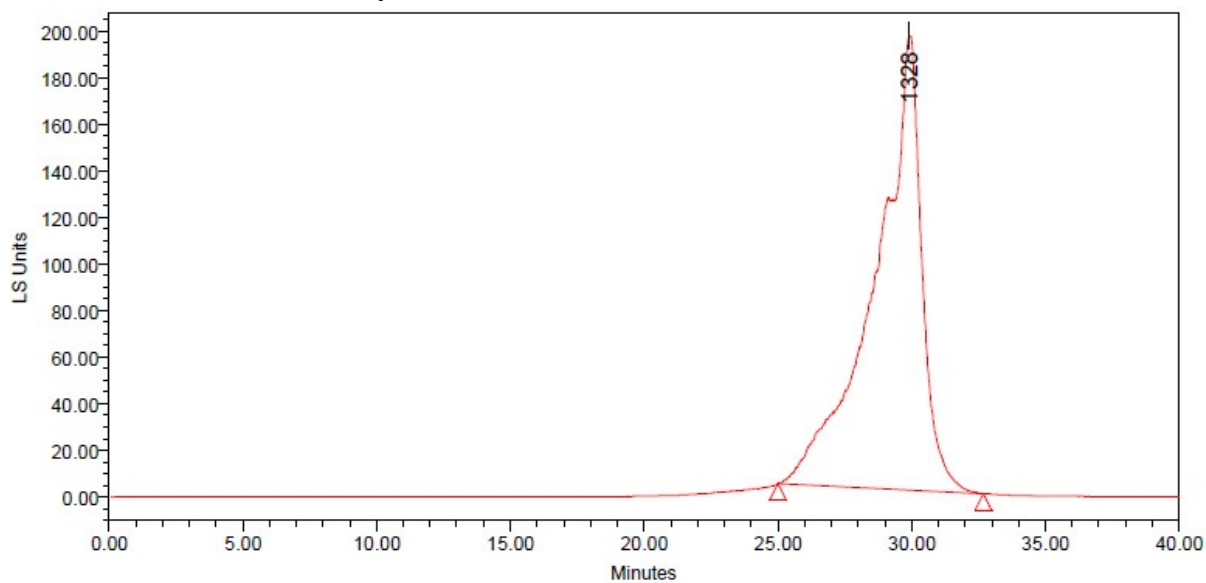

**GPC Results**

|   | Mn   | Mw   | MP   | Mz   | Mz+1 | Polydispersity | Retention Time (min) |
|---|------|------|------|------|------|----------------|----------------------|
| 1 | 1810 | 2907 | 1328 | 5303 | 8482 | 1.605737       | 29.928               |

**Figure S7** GPC chromatogram of **P1**.

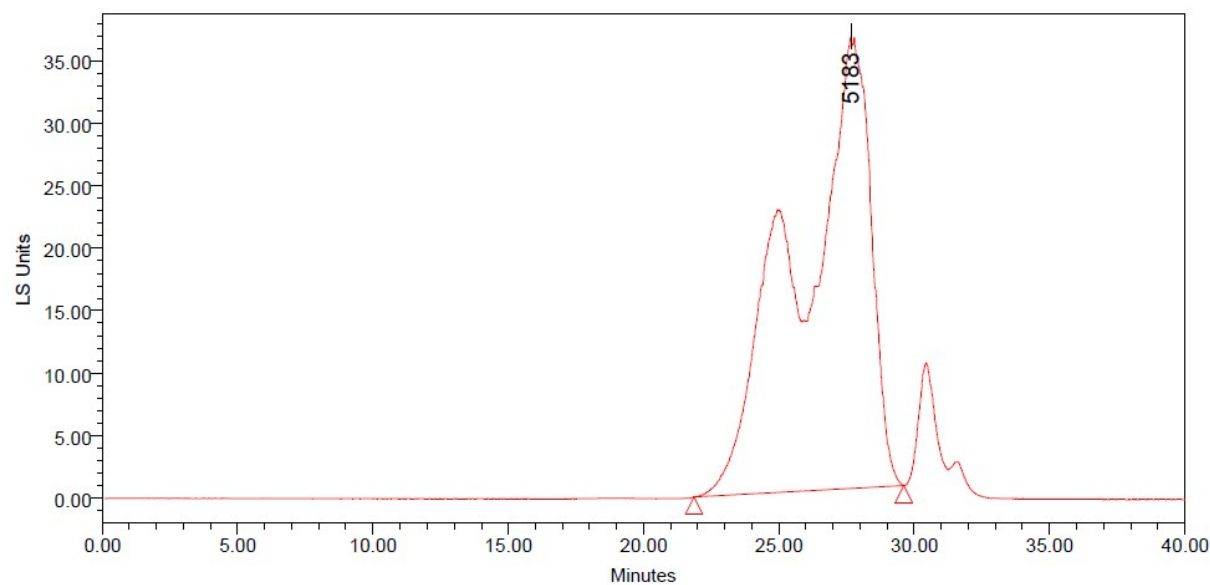

**GPC Results**

|   | Mn   | Mw    | MP   | Mz    | Mz+1  | Polydispersity | Retention Time (min) |
|---|------|-------|------|-------|-------|----------------|----------------------|
| 1 | 7257 | 14271 | 5183 | 27417 | 42030 | 1.966429       | 27.657               |

**Figure S8** GPC chromatogram of **P2**.

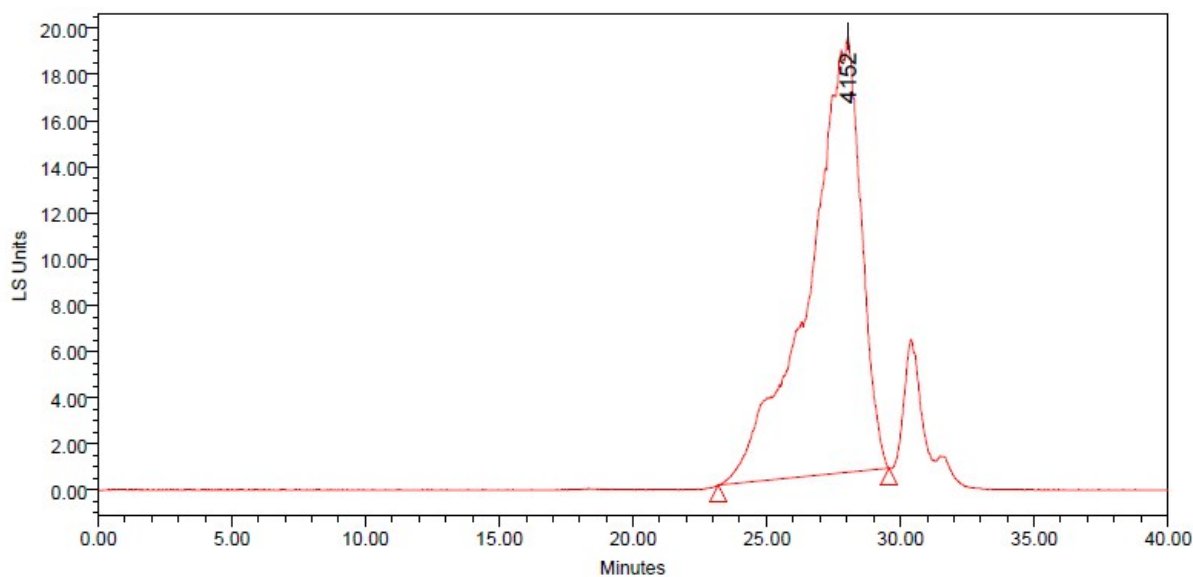

**GPC Results**

|   | Mn   | Mw   | MP   | Mz    | Mz+1  | Polydispersity | Retention Time (min) |
|---|------|------|------|-------|-------|----------------|----------------------|
| 1 | 5458 | 8230 | 4152 | 14080 | 22138 | 1.507764       | 28.049               |

**Figure S9** GPC chromatogram of **P3**.

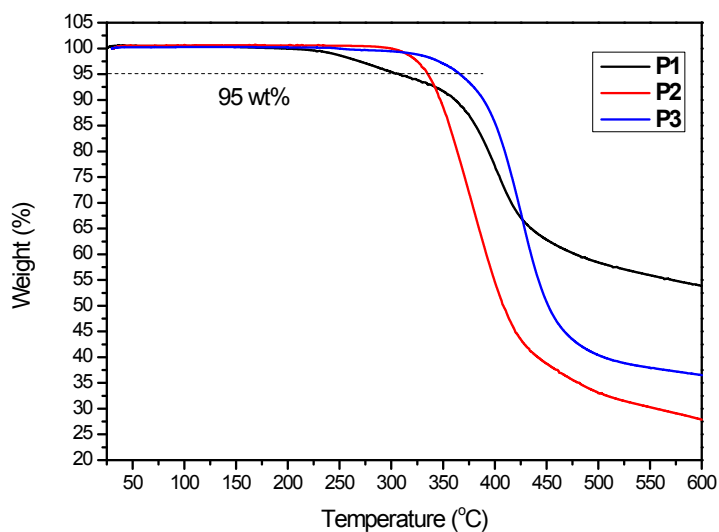

**Figure S10** Thermograms of **P1-P3**.

**Reference:**

- 1 P. M. Beaujuge, S. V. Vasilyeva, D. Y. Liu, S. Ellinger, T. D. McCarley and J. R. Reynolds, *Chem. Mater.*, 2012, **24**, 255.
- 2 M. Turbiez, P. Frère, M. Allain, C. Videlot, J. Ackermann and J. Roncali, *Chem. Eur. J.*, 2005, **11**, 3742.
